# Supplementary material for: Effects of Sachet Water Consumption on Exposure to Microbe-Contaminated Drinking Water: Household Survey Evidence from Ghana
Source: MDPI journal article supplement (doi:10.3390/ijerph13030303), 2016-03-09
Supplement: s1 [file s1]

## Supplementary Material: Effects of Sachet Water Consumption on Exposure to Microbe-Contaminated Drinking Water: Household Survey Evidence from Ghana

Jim Wright, Mawuli Dzodzomenyo, Nicola A. Wardrop, Richard Johnston, Allan Hill, Genevieve Aryeetey and Richard Adanu

**Table S1.** Multivariable multinomial regression results, excluding observations with potential errors.

| Covariate                 | Category                            | Medium Contamination (1 to 72 CFU) |                 | High Contamination (73+ CFU) |                 |
|---------------------------|-------------------------------------|------------------------------------|-----------------|------------------------------|-----------------|
|                           |                                     | RRR * (95% CI)                     | <i>p</i> -value | RRR * (95% CI)               | <i>p</i> -value |
| Constant                  |                                     | 2.25 (1.03 to 4.90)                | 0.04            | 1.66 (0.62 to 4.46)          | 0.31            |
| Water source              | Piped to premises                   | Reference                          |                 | Reference                    |                 |
|                           | Standpipe, tanker or neighbours tap | 2.50 (1.18 to 5.26)                | 0.02            | 8.00 (3.22 to 19.89)         | <0.001          |
|                           | Protected well                      | 1.58 (0.41 to 6.11)                | 0.51            | 12.32 (2.23 to 68.07)        | 0.004           |
|                           | Unprotected well or spring          | 1.94 (0.43 to 8.81)                | 0.39            | 9.64 (1.97 to 47.20)         | 0.005           |
|                           | Rainwater                           | 4.30 (0.21 to 89.54)               | 0.35            | 14.08 (0.65 to 304.24)       | 0.09            |
|                           | Surface water                       | 2.68 (0.78 to 9.20)                | 0.12            | 42.06 (11.87 to 149.10)      | <0.001          |
|                           | Packaged water                      | 0.17 (0.08 to 0.36)                | <0.001          | 0.03 (0.008 to 0.13)         | <0.001          |
|                           | Community operated borehole         | 3.33 (1.53 to 7.25)                | 0.002           | 8.28 (3.12 to 21.99)         | <0.001          |
|                           | NGO operated borehole               | 3.74 (1.25 to 11.17)               | 0.02            | 6.94 (1.63 to 29.67)         | 0.009           |
|                           | Other provider borehole             | 2.78 (0.46 to 16.77)               | 0.27            | 10.40 (1.61 to 67.16)        | 0.01            |
| Expenditure (GHC per day) |                                     | 0.98 (0.96 to 1.01)                | 0.15            | 0.97 (0.93 to 1.01)          | 0.18            |

Table S1. Cont.

| Covariate                                    | Category                            | Medium Contamination (1 to 72 CFU) |                     | High Contamination (73+ CFU) |         |
|----------------------------------------------|-------------------------------------|------------------------------------|---------------------|------------------------------|---------|
|                                              |                                     | RRR * (95% CI)                     | p-value             | RRR * (95% CI)               | p-value |
| Water source *<br>expenditure<br>interaction | Piped to premises                   | Reference                          |                     | Reference                    |         |
|                                              | Standpipe, tanker or neighbours tap | 0.98 (0.94 to 1.01)                | 0.18                | 0.97 (0.93 to 1.02)          | 0.26    |
|                                              | Protected well                      | 1.03 (0.93 to 1.15)                | 0.58                | 0.96 (0.83 to 1.10)          | 0.52    |
|                                              | Unprotected well or spring          | 1.06 (0.87 to 1.29)                | 0.59                | 1.05 (0.87 to 1.27)          | 0.62    |
|                                              | Rainwater                           | 0.97 (0.71 to 1.35)                | 0.88                | 0.91 (0.65 to 1.28)          | 0.59    |
|                                              | Surface water                       | 0.96 (0.87 to 1.05)                | 0.39                | 0.89 (0.82 to 0.97)          | 0.01    |
|                                              | Packaged water                      | 1.02 (0.99 to 1.05)                | 0.13                | 1.01 (0.93 to 1.10)          | 0.78    |
|                                              | Community operated borehole         | 1.00 (0.98 to 1.03)                | 0.80                | 1.00 (0.93 to 1.07)          | 0.95    |
|                                              | NGO operated borehole               | 0.89 (0.80 to 0.99)                | 0.04                | 0.93 (0.81 to 1.07)          | 0.31    |
| Other provider borehole                      | 1.07 (0.86 to 1.32)                 | 0.56                               | 1.02 (0.83 to 1.26) | 0.85                         |         |
| Improved sanitation                          | No                                  | Reference                          |                     | Reference                    |         |
|                                              | Yes                                 | 0.69 (0.47 to 1.00)                | 0.05                | 0.73 (0.49 to 1.09)          | 0.12    |
| Water obtained<br>from source or<br>vessel   | From source                         | Reference                          |                     | Reference                    |         |
|                                              | From covered vessel                 | 1.01 (0.67 to 1.51)                | 0.97                | 0.58 (0.36 to 0.91)          | 0.02    |
|                                              | From uncovered vessel               | 1.55 (0.70 to 3.41)                | 0.28                | 1.93 (0.85 to 4.37)          | 0.12    |

\* RRR = relative risk ratio. *n* = 2552.

**Table S2.** Descriptive statistics for *E. coli* contamination of water at the point of consumption,  $n = 2972$ .

| Variable                                  | Category                            | Contamination Level * (Rows Sum to 100%) |       |        |       |
|-------------------------------------------|-------------------------------------|------------------------------------------|-------|--------|-------|
|                                           |                                     | Uncontaminated                           | Low   | Medium | High  |
| Total                                     |                                     | 28.0%                                    | 20.4% | 16.9%  | 34.7% |
| Source contamination risk factors         |                                     |                                          |       |        |       |
| Water source                              | Piped to premises                   | 34.5%                                    | 36.7% | 12.5%  | 16.4% |
|                                           | Standpipe, tanker or neighbours tap | 13.8%                                    | 17.8% | 24.4%  | 44.0% |
|                                           | Protected well                      | 11.8%                                    | 16.2% | 14.8%  | 57.2% |
|                                           | Unprotected well or spring          | 12.2%                                    | 10.4% | 26.5%  | 50.9% |
|                                           | Rainwater                           | 7.1%                                     | 25.0% | 26.4%  | 41.6% |
|                                           | Surface water                       | 5.1%                                     | 3.7%  | 13.4%  | 77.8% |
|                                           | Packaged water                      | 68.8%                                    | 25.3% | 3.8%   | 2.0%  |
|                                           | Community borehole                  | 10.7%                                    | 21.6% | 22.4%  | 45.2% |
|                                           | NGO borehole                        | 13.6%                                    | 16.7% | 25.1%  | 44.6% |
|                                           | Other borehole                      | 7.9%                                     | 11.0% | 31.6%  | 49.4% |
|                                           | Missing                             | 9.7%                                     | 49.0% | 15.5%  | 25.9% |
| Distance between latrine and water source | Within 30m                          | 8.6%                                     | 17.0% | 21.3%  | 53.2% |
|                                           | More than 30m                       | 10.0%                                    | 14.2% | 22.1%  | 53.7% |
|                                           | Not ground water                    | 42.5%                                    | 24.6% | 13.0%  | 19.9% |
| Urban                                     | No                                  | 15.5%                                    | 15.1% | 20.9%  | 48.6% |
|                                           | Yes                                 | 38.4%                                    | 24.8% | 13.6%  | 23.3% |
| Recontamination risk factors              |                                     |                                          |       |        |       |
| Improved sanitation                       | No                                  | 13.6%                                    | 16.3% | 21.3%  | 48.8% |
|                                           | Yes                                 | 31.5%                                    | 21.4% | 15.7%  | 31.5% |
|                                           | Missing                             | 6.3%                                     | 18.4% | 54.6%  | 20.7% |
| Soap observed                             | No                                  | 19.3%                                    | 16.1% | 22.6%  | 42.1% |
|                                           | Yes                                 | 32.5%                                    | 22.6% | 13.9%  | 30.9% |
| Water obtained from source or vessel      | From source                         | 47.1%                                    | 22.7% | 10.4%  | 19.8% |
|                                           | From covered vessel                 | 17.4%                                    | 19.1% | 22.4%  | 41.1% |
|                                           | From uncovered vessel               | 6.4%                                     | 11.9% | 15.7%  | 65.9% |
|                                           | Missing                             | 23.4%                                    | 29.0% | 12.2%  | 35.5% |

Table S2. Cont.

| Variable                | Category                    | Contamination Level * (Rows Sum to 100%) |           |            |           |
|-------------------------|-----------------------------|------------------------------------------|-----------|------------|-----------|
|                         |                             | Uncontaminated                           | Low       | Medium     | High      |
| Total                   |                             | 28.0%                                    | 20.4%     | 16.9%      | 34.7%     |
| Water storage container | Plastic bucket or container | 24.7%                                    | 19.8%     | 17.9%      | 37.7%     |
|                         | Pot or earthenware vessel   | 7.6%                                     | 17.6%     | 24.0%      | 50.7%     |
|                         | Metal container             | 12.7%                                    | 11.5%     | 18.7%      | 57.1%     |
|                         | Other (including sachets)   | 61.7%                                    | 27.1%     | 7.0%       | 4.2%      |
|                         | Missing                     | 59.8%                                    | 40.2%     | 0%         | 0%        |
| Expenditure (GH¢)       | Mean                        | 13.3                                     | 10.0      | 7.8        | 6.5       |
|                         | Median                      | 9.0                                      | 7.8       | 5.7        | 4.9       |
|                         | Range (min - max)           | 0.70–227.9                               | 0.79–71.9 | 0.33–103.3 | 0.18–60.1 |

\* Contamination levels: uncontaminated (0 cfu/100 mL); low contamination (1 to 12 cfu/100 mL); medium contamination (1 to 72 cfu/100 mL); high contamination (>72 cfu/100 mL).

**Table S3.** Relative risk ratios for low (1 to 12 cfu/100 mL), medium (13 to 72 cfu/100 mL) and high (>72 cfu/100 mL) contamination of water at the point of consumption with *E. coli* derived from univariable multinomial regression analysis.

| Covariate    | Category                            | Low Contamination (1 to 12 CFU) |                 | Medium Contamination (13 to 72 CFU) |                 | High Contamination (73+ CFU) |                 |
|--------------|-------------------------------------|---------------------------------|-----------------|-------------------------------------|-----------------|------------------------------|-----------------|
|              |                                     | RRR * (95% CI)                  | <i>p</i> -value | RRR * (95% CI)                      | <i>p</i> -value | RRR * (95% CI)               | <i>p</i> -value |
|              | Piped to premises                   | Reference                       |                 | Reference                           |                 | Reference                    |                 |
| Water source | Standpipe, tanker or neighbours tap | 1.21 (0.67 to 2.17)             | 0.53            | 4.88 (2.56 to 9.32)                 | <0.001          | 6.69 (3.57 to 12.55)         | <0.001          |
|              | Protected well                      | 1.30 (0.46 to 3.67)             | 0.62            | 3.49 (1.24 to 9.80)                 | 0.02            | 10.24 (4.30 to 24.39)        | <0.001          |
|              | Unprotected well or spring          | 0.80 (0.22 to 2.93)             | 0.73            | 5.99 (1.77 to 20.24)                | 0.004           | 8.76 (2.67 to 28.76)         | <0.001          |
|              | Rainwater                           | 3.32 (0.81 to 13.66)            | 0.10            | 10.33 (2.73 to 39.05)               | 0.001           | 12.38 (3.13 to 48.94)        | <0.001          |
|              | Surface water                       | 0.68 (0.26 to 1.80)             | 0.44            | 7.31 (2.88 to 18.60)                | <0.001          | 32.28 (13.63 to 76.48)       | <0.001          |
|              | Packaged water                      | 0.35 (0.20 to 0.59)             | <0.001          | 0.15 (0.07 to 0.32)                 | <0.001          | 0.06 (0.03 to 0.13)          | <0.001          |
|              | Community-managed borehole          | 1.90 (1.01 to 3.57)             | 0.05            | 5.79 (2.89 to 11.60)                | <0.001          | 8.89 (4.68 to 16.88)         | <0.001          |
|              | NGO-managed borehole                | 1.16 (0.55 to 2.47)             | 0.70            | 5.13 (2.42 to 10.86)                | <0.001          | 6.93 (3.14 to 15.27)         | <0.001          |
|              | Other borehole                      | 1.31 (0.59 to 2.88)             | 0.50            | 11.03 (4.64 to 26.25)               | <0.001          | 13.12 (5.86 to 29.37)        | <0.001          |
| Expenditure  | (GH¢ per day)**                     | 0.98 (0.97 to 0.99)             | 0.001           | 0.94 (0.92 to 0.96)                 | <0.001          | 0.89 (0.87 to 0.92)          | <0.001          |

Table S3. Cont.

| Covariate                                 | Category                    | Low Contamination (1 to 12 CFU) |         | Medium Contamination (13 to 72 CFU) |         | High Contamination (73+ CFU) |         |
|-------------------------------------------|-----------------------------|---------------------------------|---------|-------------------------------------|---------|------------------------------|---------|
|                                           |                             | RRR* (95% CI)                   | p-value | RRR*(95% CI)                        | p-value | RRR*(95% CI)                 | p-value |
| Improved sanitation                       | No                          | Reference                       |         | Reference                           |         | Reference                    |         |
|                                           | Yes                         | 0.57 (0.40 to 0.81)             | 0.002   | 0.32 (0.22 to 0.46)                 | <0.001  | 0.28 (0.20 to 0.39)          | <0.001  |
| Soap observed                             | No                          | Reference                       |         | Reference                           |         | Reference                    |         |
|                                           | Yes                         | 0.84 (0.60 to 1.17)             | 0.30    | 0.37 (0.26 to 0.52)                 | <0.001  | 0.44 (0.33 to 0.58)          | <0.001  |
| Water obtained from source or vessel      | From source                 | Reference                       |         | Reference                           |         | Reference                    |         |
|                                           | From covered vessel         | 2.28 (1.60 to 3.25)             | <0.001  | 5.86(3.80 to 9.02)                  | <0.001  | 5.62 (3.99 to 7.91)          | <0.001  |
|                                           | From uncovered vessel       | 3.83 (1.48 to 9.90)             | 0.006   | 11.10 (4.39 to 28.07)               | <0.001  | 24.29 (10.05 to 58.71)       | <0.001  |
| Urban                                     | No                          | Reference                       |         | Reference                           |         | Reference                    |         |
|                                           | Yes                         | 0.66 (0.47 to 0.93)             | 0.02    | 0.26 (0.18 to 0.38)                 | <0.001  | 0.19(0.14 to 0.26)           | <0.001  |
| Water storage container                   | Plastic bucket or container | Reference                       |         | Reference                           |         | Reference                    |         |
|                                           | Pot or earthenware vessel   | 2.88 (1.65 to 5.02)             | <0.001  | 4.34(2.62 to 7.18)                  | <0.001  | 4.35 (2.69 to 7.02)          | <0.001  |
|                                           | Metal container             | 1.13 (0.53 to 2.42)             | 0.76    | 2.04(1.00 to 4.15)                  | 0.05    | 2.94 (1.60 to 5.38)          | 0.001   |
|                                           | Other (including sachets)   | 0.55(0.36 to 0.82)              | 0.004   | 0.16 (0.09 to 0.29)                 | <0.001  | 0.04 (0.02 to 0.09)          | <0.001  |
| Distance between latrine and water source | Within 30m                  | Reference                       |         | Reference                           |         | Reference                    |         |
|                                           | More than 30m               | 0.72 (0.39 to 1.32)             | 0.28    | 0.90 (0.52 to 1.55)                 | 0.70    | 0.87 (0.52 to 1.45)          | 0.60    |
|                                           | Not ground water            | 0.29 (0.18 to 0.49)             | <0.001  | 0.12 (0.07 to 0.31)                 | <0.001  | 0.08 (0.05 to 0.12)          | <0.001  |

\* RRR = relative risk ratio. \*\* RRRs for expenditure relate to a GHC1 increase in expenditure.

**Table S4.** Relative risk ratios for low (1 to 12 cfu/100 mL), medium (13 to 72 cfu/100 mL) and high (>72 cfu/100 mL) contamination of drinking cup water with *E. coli* derived from multivariable multinomial regression analysis.

| Covariate                              | Category                            | Low Contamination<br>(1 to 12 CFU) |                      | Medium Contamination<br>(13 to 72 CFU) |                      | High Contamination<br>(73+ CFU) |         |
|----------------------------------------|-------------------------------------|------------------------------------|----------------------|----------------------------------------|----------------------|---------------------------------|---------|
|                                        |                                     | RRR * (95% CI)                     | p-Value              | RRR * (95% CI)                         | p-Value              | RRR * (95% CI)                  | p-Value |
| Constant                               |                                     | 2.10 (0.99 to 4.43)                | 0.05                 | 0.69 (0.27 to 1.77)                    | 0.44                 | 1.17 (0.45 to 3.04)             | 0.74    |
| Water source                           | Piped to premises                   | Reference                          |                      | Reference                              |                      | Reference                       |         |
|                                        | Standpipe, tanker or neighbours tap | 1.22 (0.56 to 2.63)                | 0.61                 | 6.26 (2.49 to 15.73)                   | <0.001               | 8.40 (3.44 to 20.52)            | <0.001  |
|                                        | Protected well                      | 0.36 (0.10 to 1.30)                | 0.12                 | 5.52 (0.88 to 34.54)                   | 0.07                 | 9.91 (1.93 to 51.02)            | 0.006   |
|                                        | Unprotected well or spring          | 0.94 (0.22 to 3.97)                | 0.93                 | 6.19 (1.65 to 23.25)                   | 0.007                | 10.28 (2.81 to 37.66)           | <0.001  |
|                                        | Rainwater                           | 0.85 (0.04 to 16.12)               | 0.91                 | 10.73 (0.53 to 219.40)                 | 0.12                 | 16.17 (0.87 to 299.05)          | 0.06    |
|                                        | Surface water                       | 0.91 (0.24 to 3.38)                | 0.88                 | 6.94 (2.00 to 24.04)                   | 0.002                | 42.52 (12.78 to 141.43)         | <0.001  |
|                                        | Packaged water                      | 0.20 (0.10 to 0.41)                | <0.001               | 0.12 (0.04 to 0.38)                    | <0.001               | 0.04 (0.009 to 0.15)            | <0.001  |
|                                        | Community-managed borehole          | 1.25 (0.58 to 2.72)                | 0.57                 | 4.54 (1.75 to 11.82)                   | 0.002                | 6.36 (2.48 to 16.31)            | <0.001  |
|                                        | NGO-managed borehole                | 1.07 (0.30 to 3.86)                | 0.91                 | 10.13 (3.25 to 31.54)                  | <0.001               | 6.95 (1.78 to 27.14)            | 0.005   |
| Other borehole                         | 0.79 (0.16 to 3.97)                 | 0.78                               | 5.25 (1.04 to 26.46) | 0.05                                   | 8.68 (1.74 to 43.27) | 0.008                           |         |
| Expenditure                            | (GHC per day) **                    | 0.97 (0.94 to 1.00)                | 0.03                 | 0.99 (0.96 to 1.02)                    | 0.54                 | 0.98 (0.94 to 1.02)             | 0.22    |
| Water source * expenditure interaction | Piped to premises                   | Reference                          |                      | Reference                              |                      | Reference                       |         |
|                                        | Standpipe, tanker or neighbours tap | 0.98 (0.94 to 1.02)                | 0.40                 | 0.97 (0.93 to 1.01)                    | 0.15                 | 0.97 (0.92 to 1.02)             | 0.21    |
|                                        | Protected well                      | 1.10 (0.98 to 1.24)                | 0.10                 | 0.90 (0.75 to 1.08)                    | 0.27                 | 0.96 (0.82 to 1.12)             | 0.59    |
|                                        | Unprotected well or spring          | 1.02 (0.89 to 1.17)                | 0.74                 | 1.03 (0.90 to 1.18)                    | 0.68                 | 1.01 (0.89 to 1.15)             | 0.86    |
|                                        | Rainwater                           | 1.12 (0.83 to 1.53)                | 0.46                 | 0.96 (0.70 to 1.32)                    | 0.81                 | 0.92 (0.67 to 1.26)             | 0.59    |
|                                        | Surface water                       | 0.91 (0.80 to 1.04)                | 0.17                 | 0.97 (0.88 to 1.06)                    | 0.51                 | 0.89 (0.82 to 0.97)             | 0.009   |
|                                        | Packaged water                      | 1.03 (1.00 to 1.06)                | 0.04                 | 1.00 (0.95 to 1.05)                    | 0.89                 | 1.01 (0.93 to 1.10)             | 0.85    |
|                                        | Community-managed borehole          | 1.02 (0.99 to 1.05)                | 0.20                 | 1.00(0.96 to 1.04)                     | 0.87                 | 1.00 (0.94 to 1.06)             | 0.98    |
|                                        | NGO-managed borehole                | 0.97 (0.85 to 1.09)                | 0.58                 | 0.84 (0.75 to 0.95)                    | 0.004                | 0.93 (0.82 to 1.06)             | 0.29    |
| Other borehole                         | 1.04 (0.87 to 1.25)                 | 0.65                               | 1.08 (0.89 to 1.31)  | 0.44                                   | 1.03 (0.85 to 1.23)  | 0.79                            |         |

Table S4. Cont.

| Covariate                            | Category              | Low Contamination<br>(1 to 12 CFU) |      | Medium Contamination<br>(13 to 72 CFU) |      | High Contamination<br>(73+ CFU) |      |
|--------------------------------------|-----------------------|------------------------------------|------|----------------------------------------|------|---------------------------------|------|
| Improved sanitation                  | No                    | Reference                          |      | Reference                              |      | Reference                       |      |
|                                      | Yes                   | 0.85 (0.58 to 1.23)                | 0.38 | 0.80 (0.53 to 1.21)                    | 0.29 | 0.89 (0.61 to 1.30)             | 0.54 |
| Water obtained from source or vessel | From source           | Reference                          |      | Reference                              |      | Reference                       |      |
|                                      | From covered vessel   | 0.90 (0.61 to 1.33)                | 0.60 | 0.78 (0.46 to 1.33)                    | 0.37 | 0.59 (0.38 to 0.92)             | 0.02 |
|                                      | From uncovered vessel | 1.95 (0.73 to 5.19)                | 0.18 | 1.69 (0.67 to 4.28)                    | 0.27 | 2.73 (1.13 to 6.23)             | 0.03 |

\* RRR = relative risk ratio. *N* = 2822. \*\* RRRs for expenditure relate to a GHC1 increase in expenditure.

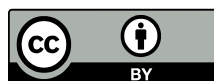

© 2016 by the authors; licensee MDPI, Basel, Switzerland. This article is an open access article distributed under the terms and conditions of the Creative Commons by Attribution (CC-BY) license (<http://creativecommons.org/licenses/by/4.0/>).
